# Supplementary material for: Concentration, Health Risk, and Hydrological Forcing of Heavy Metals in Surface Water Following Water-Sediment Regulation of the Xiaolangdi Dam in the Yellow River
Source: MDPI journal article supplement (doi:10.3390/ijerph19095713), 2022-05-07
Supplement: s1 [file s1]

## Supplementary Materials

### Concentration, Health Risk, and Hydrological Forcing of Heavy Metals in Surface Water

#### Following Water-Sediment Regulation of the Xiaolangdi Dam in the Yellow River

Qinghe Zhao, Shengyan Ding \*, Zihan Geng, Zhendong Hong, Jinhai Yu, Yi Liu

Key Laboratory of Geospatial Technology for the Middle and Lower Yellow River Regions of the  
Ministry of Education, College of Geography and Environmental Science, Henan University,

Kaifeng, Henan 475004, China

\* Corresponding author (Shengyan Ding), e-mail address: syding@henu.edu.cn

**Table S1.** Sampling sites characteristics in the Xiaolangdi Reservoir and the downstream reach in the Yellow River.

| No. | Region     | Longitude (°) | Latitude (°) | Elevation (m) | Distance to dam (km) |
|-----|------------|---------------|--------------|---------------|----------------------|
| S1  | Reservoir  | E111.356      | N34.821      | 272.4         | 126.3                |
| S2  | Reservoir  | E111.601      | N34.892      | 253.9         | 99.3                 |
| S3  | Reservoir  | E111.810      | N35.055      | 255.6         | 67.4                 |
| S4  | Reservoir  | E112.009      | N35.046      | 246.5         | 48.6                 |
| S5  | Reservoir  | E112.358      | N34.941      | 251.2         | 5.9                  |
| S6  | Downstream | E112.632      | N34.850      | 115.0         | 23.4                 |
| S7  | Downstream | E113.077      | N34.844      | 106.1         | 71.9                 |
| S8  | Downstream | E113.697      | N34.910      | 91.4          | 151.4                |
| S9  | Downstream | E114.139      | N34.958      | 79.6          | 201.2                |
| S10 | Downstream | E114.496      | N34.920      | 75.3          | 238.4                |
| S11 | Downstream | E114.694      | N34.912      | 74.0          | 263.4                |

**Table S2.** Values of water pollution indices for individual sampling locations in the Xiaolangdoi Reservoir and its downstream reach in the middle and lower reaches of the Yellow River, China.

| Season       | Region     | No. | HEI  | Mq-HPI |       | Mqw-HPI |       |
|--------------|------------|-----|------|--------|-------|---------|-------|
|              |            |     |      | PI     | NI    | PI      | NI    |
| Post-WSRS I  | Reservoir  | S1  | 0.25 | 0      | -0.95 | 0       | -0.96 |
|              |            | S2  | 0.29 | 0      | -0.94 | 0       | -0.96 |
|              |            | S3  | 0.21 | 0      | -0.96 | 0       | -0.96 |
|              |            | S4  | 0.24 | 0      | -0.96 | 0       | -0.96 |
|              |            | S5  | 0.25 | 0      | -0.96 | 0       | -0.96 |
|              | Downstream | S6  | 0.17 | 0      | -0.97 | 0       | -0.97 |
|              |            | S7  | 0.49 | 0      | -0.89 | 0       | -0.93 |
|              |            | S8  | 0.20 | 0      | -0.97 | 0       | -0.96 |
|              |            | S9  | 0.46 | 0      | -0.91 | 0       | -0.93 |
|              |            | S10 | 0.24 | 0      | -0.96 | 0       | -0.96 |
|              |            | S11 | 0.42 | 0      | -0.91 | 0       | -0.93 |
| Post-WSRS II | Reservoir  | S1  | 1.59 | 0      | -0.64 | 0       | -0.80 |
|              |            | S2  | 1.10 | 0      | -0.77 | 0       | -0.86 |
|              |            | S3  | 0.98 | 0      | -0.80 | 0       | -0.88 |
|              |            | S4  | 0.83 | 0      | -0.84 | 0       | -0.89 |
|              |            | S5  | 1.23 | 0      | -0.75 | 0       | -0.85 |
|              | Downstream | S6  | 1.36 | 0      | -0.71 | 0       | -0.84 |
|              |            | S7  | 1.05 | 0      | -0.78 | 0       | -0.85 |
|              |            | S8  | 0.84 | 0      | -0.82 | 0       | -0.87 |
|              |            | S9  | 1.16 | 0      | -0.74 | 0       | -0.83 |
|              |            | S10 | 0.99 | 0      | -0.77 | 0       | -0.86 |
|              |            | S11 | 1.31 | 0      | -0.69 | 0       | -0.83 |

Note: HEI indicates the heavy metal evaluation index; Mq-HPI indicates the modified heavy metal pollution index based on sub index Q; Mqw-HPI indicates the modified heavy metal pollution index based on weight and sub index Q.

**Table S3.** Standard permissible limit, assigned weights and calculated unit weights of individual heavy metals for the heavy metal contamination index (HCI).

| Heavy metal | $S_i$ | $Aw_i$ | $W_i$ |
|-------------|-------|--------|-------|
| As          | 10    | 3      | 0.200 |
| Cr          | 50    | 2      | 0.133 |
| Hg          | 6     | 4      | 0.267 |
| Ni          | 70    | 2      | 0.133 |
| Pb          | 10    | 3      | 0.200 |
| Zn          | 3000  | 1      | 0.067 |

Note:  $Aw_i$  is the assigned weight for the  $i^{th}$  heavy metal based on Delphi's method, and the sum of  $Aw_i = 15$ ;  $W_i$  is the calculated unit weights for the  $i^{th}$  heavy metal, and the sum of  $W_i = 1$ ;  $S_i$  represents the standard permissible limit for the  $i^{th}$  heavy metal in  $\mu\text{g/L}$  (World Health Organization) ([Mohebbi et al., 2013](#); [Rajkumar et al., 2020](#)).
